# Supplementary material for: Sequential variation of super periodic structures emerged in Bi-layered perovskite pillar-matrix epitaxial nanocomposite films with spinel ferrites
Source: Royal Society of Chemistry journal article supplement (doi:10.1039/d1ce00990g), 2021-01-01
Supplement: d1ce00990g1.pdf [file d1ce00990g1.pdf]

## Sequential variation of super periodic structures emerged in Bi-layered perovskites pillar-matrix epitaxial nanocomposite films with spinel ferrites

R. Harada,<sup>a</sup> Y. Kawahira,<sup>a</sup> T. Ikeda,<sup>a</sup> S. Maruyama,<sup>a</sup> and Y. Matsumoto <sup>\*a</sup>

<sup>a</sup> Department of Applied Chemistry, Tohoku University, Sendai, 980-8579, Japan.

\*Corresponding authors

### Supporting information

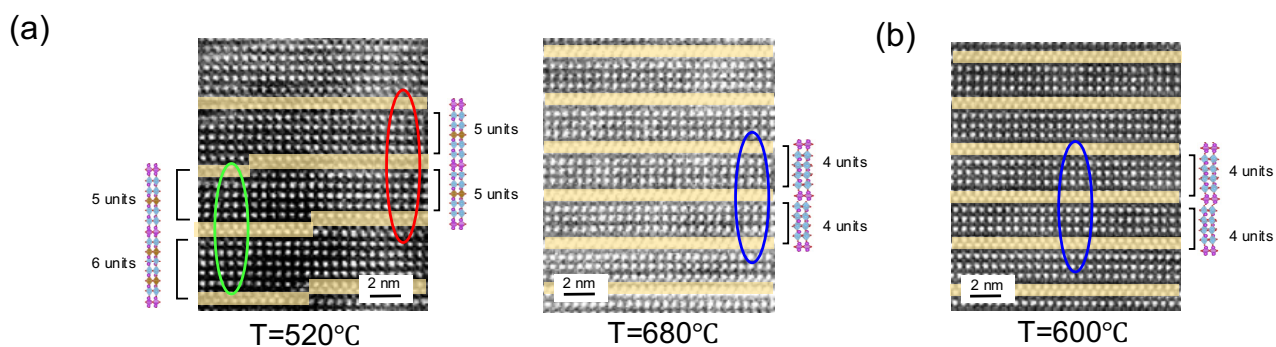

**Figure S1.** High-resolution HAADF-STEM images of BTFO phases.

(a) BTFO-CFO composite films grown at 520 °C and 680 °C, respectively.

(b) BTFO-NFO composite film grown at 600 °C.

(a)

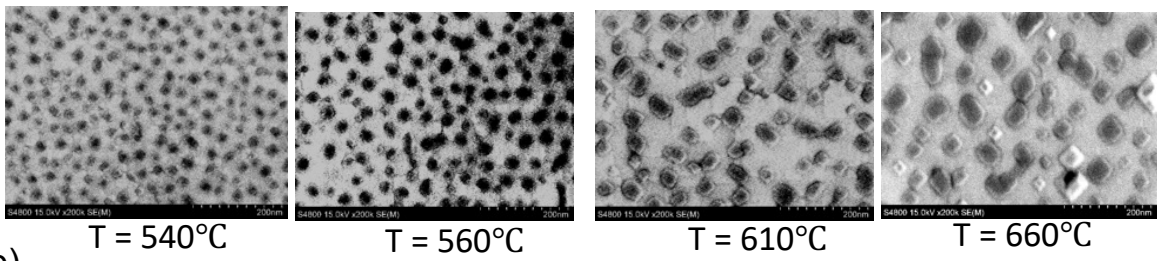

(b)

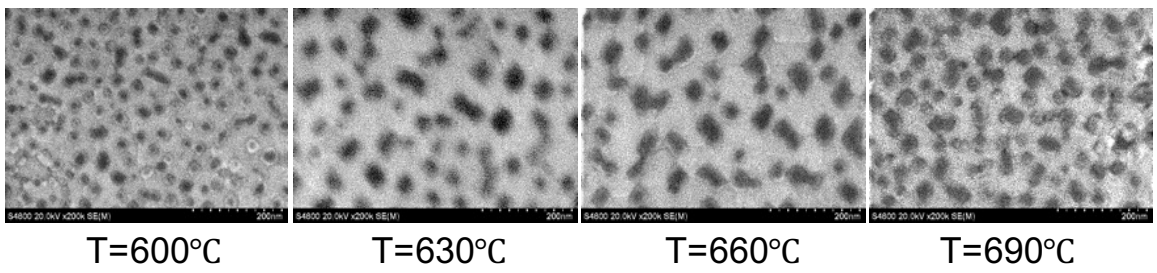

**Figure S2.** SEM images of BTFO-MFO (M=Co and Ni) composite films for different growth temperatures. (a) BTFO-CFO composite films. (b) BTFO-NFO composite films.

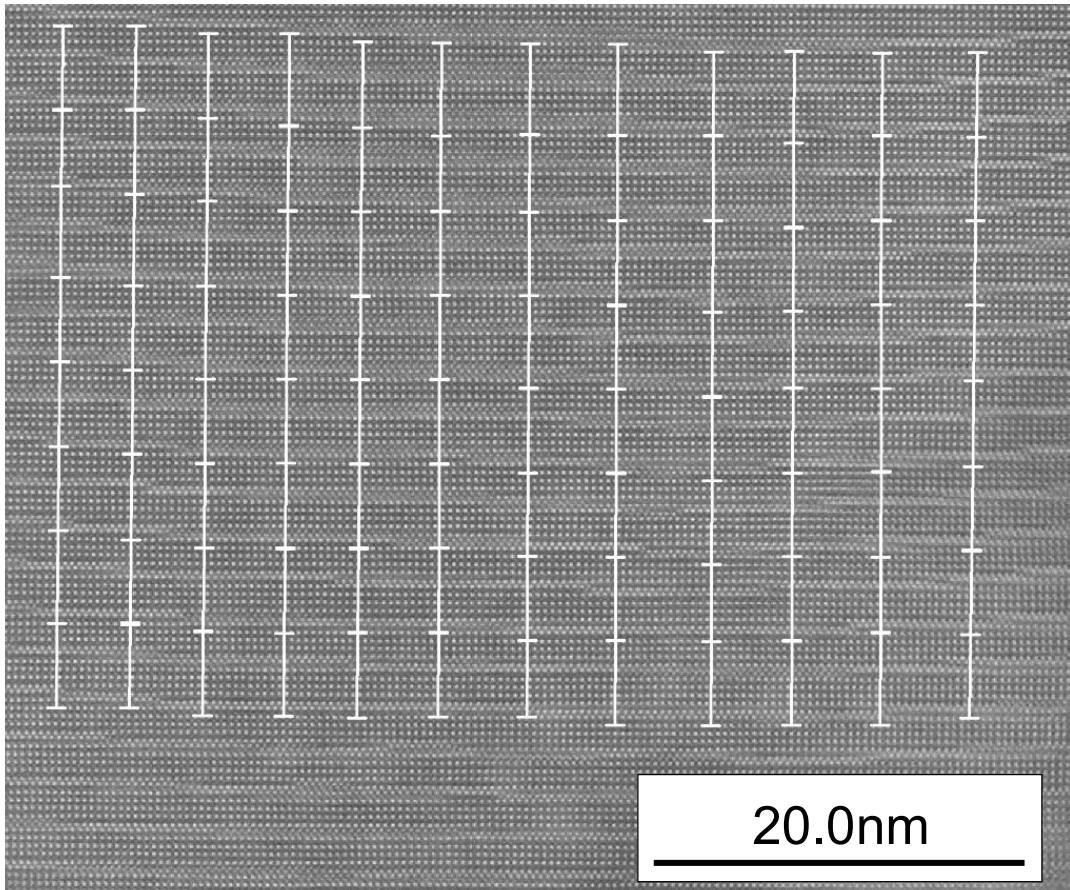

**Figure S3.** Expanded HAADF-STEM image of the BTFO matrix in a BTFO15-CFO composite film at 580°C.

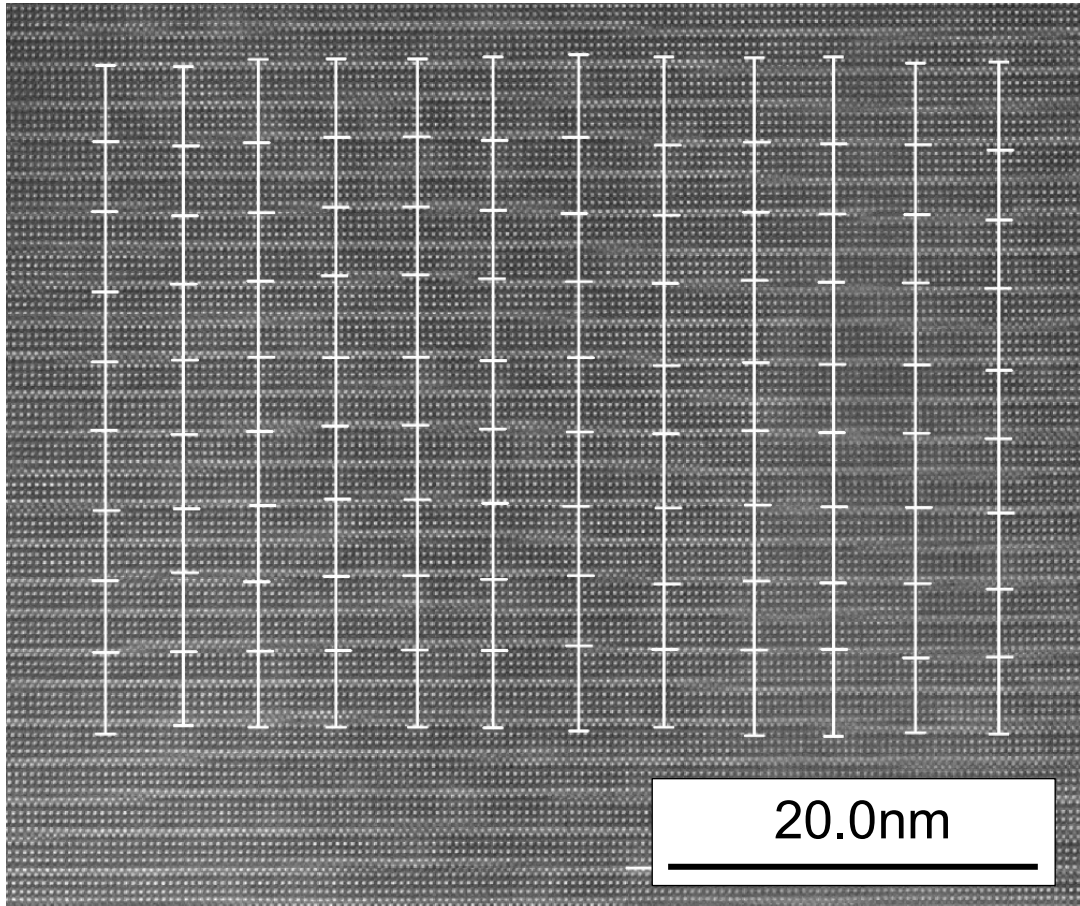

**Figure S4.** Expanded HAADF-STEM image of the BTFO matrix in a BTFO15-NFO composite film at 680°C.

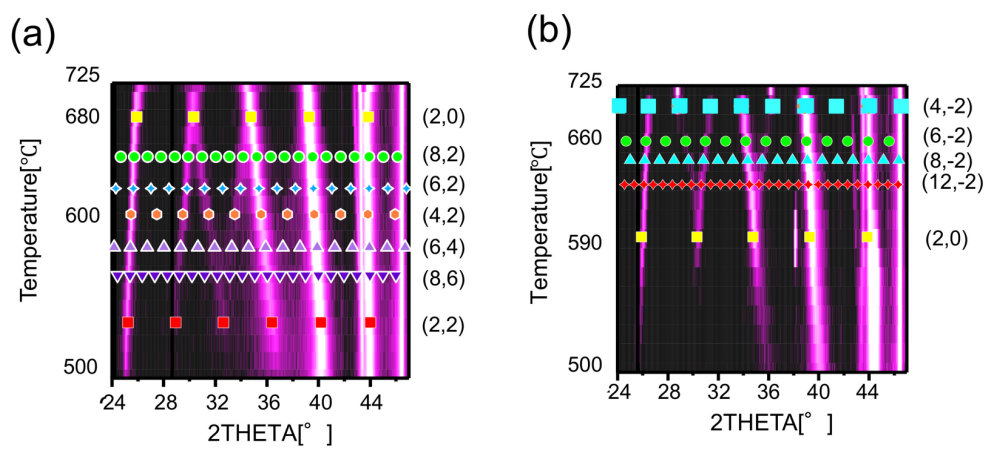

**Figure S5.** XRD image patterns of Fig. 1 with phase indexes of BTFO super periodic structures for (a) BTFO-CFO composite films and (b) BTFO-NFO composite films.

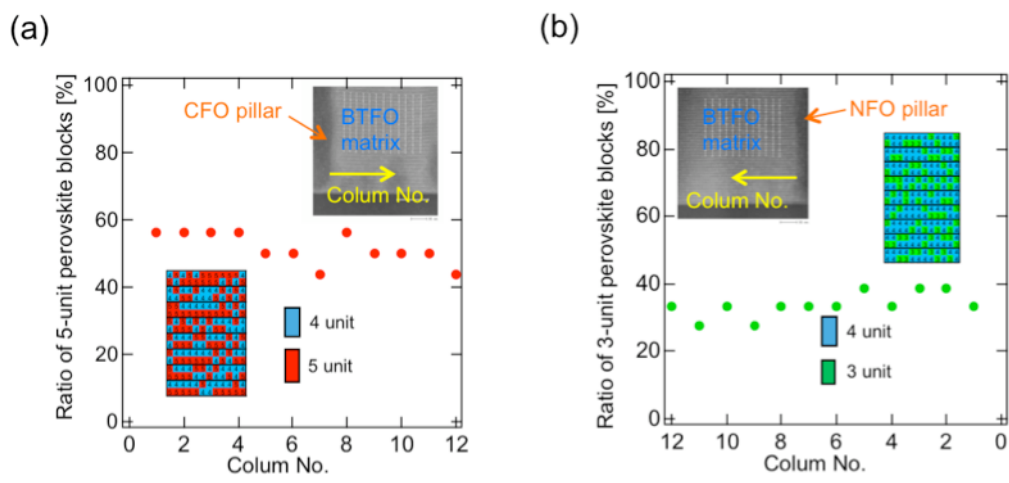

**Figure S6.** Ratio of perovskite blocks with one more or one less unit vs. the distance from a spinel ferrite pillar. (a) BTFO-CFO composite film at 580 °C. (b) BTFO-NFO composite film at 680 °C.
